# Supplementary material for: Immunotranscriptomic profiling the acute and clearance phases of a human challenge dengue virus serotype 2 infection model
Source: PubMed Central journal article supplement (PMC8144425; doi:10.1038/s41467-021-22930-6), 2021-05-24
Supplement: 41467_2021_22930_MOESM1_ESM.pdf [file 41467_2021_22930_MOESM1_ESM.pdf]

Supplementary Table 1. Subset demographics.

Supplementary Table 2. List of reagents used.

Supplementary Figure 1 | DENV2 viremia after rDEN2Δ30 infection.

Supplementary Figure 2 | DENV2 serum neutralizing antibodies after rDEN2Δ30 infection.

Supplementary Figure 3 | Quantity and quality of cellular mRNA during rDEN2Δ30 infection.

Supplementary Figure 4 | Flow cytometric gating strategy

Supplementary Figure 5 | Titration of flow cytometry antibodies

**Supplementary Table 1. Subset demographics.**

|                  | <i>Parent study<br/>(n = 20)</i> | <i>Gene<br/>expression<br/>subset (n = 11)</i> |
|------------------|----------------------------------|------------------------------------------------|
| <i>Female</i>    | 6 (30%)                          | 2 (18%)                                        |
| <i>Male</i>      | 14 (70%)                         | 9 (82%)                                        |
| <i>Black</i>     | 9 (45%)                          | 5 (45%)                                        |
| <i>White</i>     | 11 (55%)                         | 6 (55%)                                        |
| <i>Baltimore</i> | 11 (55%)                         | 6 (55%)                                        |
| <i>Vermont</i>   | 9 (45%)                          | 5 (45%)                                        |

**Supplementary Table 2. List of reagents used.**

| REAGENT or RESOURCE                         |              | SOURCE    | IDENTIFIER                   |
|---------------------------------------------|--------------|-----------|------------------------------|
| Antibodies                                  |              |           |                              |
| Anti-human CD3 (UCHT1)<br>FITC-conjugated   | 0.25 µL/test | Biolegend | Cat. #300406<br>Lot #B279208 |
| Anti-human CD4 (OKT4)<br>BV510-conjugated   | 1 µL/test    | Biolegend | Cat. #317444<br>Lot #B248141 |
| Anti-human CD8 (RPA-T8)<br>BV650-conjugated | 0.5 µL/test  | Biolegend | Cat. #301041<br>Lot #B275821 |
| Anti-human CD14 (M5E2)<br>BV711-conjugated  | 1 µL/test    | Biolegend | Cat. #301837<br>Lot #B275829 |

|                                                      |               |              |                                |
|------------------------------------------------------|---------------|--------------|--------------------------------|
| Anti-human CD16 (3G8)<br>APC-Cy7-conjugated          | 0.25 µL/test  | Biolegend    | Cat. #302017<br>Lot #B295391   |
| Anti-human CD19 (HIB19)<br>PE-Dazzle594-conjugated   | 0.5 µL/test   | Biolegend    | Cat. #302252<br>Lot #B277039   |
| Anti-human CD25 (M-A251)<br>BV421-conjugated         | 0.5 µL/test   | Biolegend    | Cat. #356113<br>Lot #B301467   |
| Anti-human CD27 (M-T271)<br>PE-Cy7-conjugated        | 0.125 µL/test | Biolegend    | Cat. #356412<br>Lot #B279971   |
| Anti-human CD38 (HIT2)<br>Alexa Fluor 647-conjugated | 0.125 µL/test | Biolegend    | Cat. #303514<br>Lot #B233813   |
| Anti-human CD45RA (HI100)<br>BUV395-conjugated       | 0.25 µL/test  | BD OptiBuild | Cat. #740298<br>Lot #0293615   |
| Anti-human CD56 (NCAM16.2)<br>BUV563-conjugated      | 0.125 µL/test | BD Horizon   | Cat. #612929<br>Lot #0044064   |
| Anti-human CD57 (QA17A04)<br>BV605-conjugated        | 0.5 µL/test   | Biolegend    | Cat. #393303<br>Lot #270939    |
| Anti-human CD127 (HIL-7R-M21)<br>BUV805-conjugated   | 0.25 µL/test  | BD OptiBuild | Cat. #748486<br>Lot #0294340   |
| Anti-human CD134 (ACT35)<br>BUV737-conjugated        | 0.125 µL/test | BD OptiBuild | Cat. #749286<br>Lot #0294339   |
| Anti-human CD154 (24-31)<br>BV785-conjugated         | 0.5 µL/test   | Biolegend    | Cat. #310841<br>Lot #B264809   |
| Anti-human HLA-DR (L243)<br>BV570-conjugated         | 2.5 µL/test   | Biolegend    | Cat. #307637<br>Lot #B314475   |
| Anti-human IgM (MHM-88)<br>PerCP-Cy5.5-conjugated    | 0.5 µL/test   | Biolegend    | Cat. #314512<br>Lot #B231968   |
| Anti-human CCR7 (2-L1-A)<br>APC-R700-conjugated      | 0.5 µL/test   | BD Horizon   | Cat. #566767<br>Lot #0283646   |
| Anti-human CD279 (EH12.2H7)<br>PE-conjugated         | 0.5 µL/test   | Biolegend    | Cat. #329905<br>Lot #B252642   |
| Human TruStain FcX blocker                           | 5 µL/test     | Biolegend    | Cat. #422302<br>Lot #B313422   |
| True-Stain Monocyte blocker                          | 5 µL/test     | Biolegend    | Cat. #426102<br>Lot #B311012   |
| Live/Dead Blue Viability Dye                         | 0.5 µL/test   | Invitrogen   | Cat. #L23105 A<br>Lot #2214471 |
| Brilliant stain buffer                               | 50 µL/test    | BD Horizon   | Cat. #566349<br>Lot #9192749   |

|                                    |  |  |  |
|------------------------------------|--|--|--|
| <b>Bacterial and Virus Strains</b> |  |  |  |
|------------------------------------|--|--|--|

|                                                                   |                                                                                          |                    |
|-------------------------------------------------------------------|------------------------------------------------------------------------------------------|--------------------|
| Dengue virus serotype 1 (West Pacific 74)<br>WHO reference strain | Stephen Whitehead,<br>National Institute of<br>Allergy and Infectious<br>Disease (NIAID) | Genbank AY145121   |
| Dengue virus serotype 2 (New Guinea C)                            | Stephen Whitehead,<br>NIAID                                                              | Genbank AF038403.1 |
| Dengue virus serotype 2 (strain S-16803)<br>WHO reference strain  | Aravinda De Silva,<br>University of North<br>Carolina-Chapel Hill<br>(UNC)               | Genbank GU289914   |
| Dengue virus serotype 3 (Sleman/78)                               | Stephen Whitehead,<br>NIAID                                                              | Genbank AY656169   |

|                                                           |                                                                                                             |                                                                   |
|-----------------------------------------------------------|-------------------------------------------------------------------------------------------------------------|-------------------------------------------------------------------|
| Dengue virus serotype 3 (CH53489)<br>WHO reference strain | Aravinda De Silva, UNC                                                                                      | Genbank DQ863638                                                  |
| Dengue virus serotype 4 Dominica/81                       | Stephen Whitehead,<br>NIAID                                                                                 | Genbank AY648301                                                  |
| Dengue virus serotype 4 (TVP-376)<br>WHO reference strain | Aravinda De Silva, UNC                                                                                      | Genbank KC963424                                                  |
| <b>Biological Samples</b>                                 |                                                                                                             |                                                                   |
| Human Serum                                               | University of Vermont<br>Vaccine Testing Center<br>and Johns Hopkins<br>Center for Immunization<br>Research | Clinicaltrials.gov<br>identifiers:<br>NCT01072786,<br>NCT02021968 |
| Peripheral blood mononuclear cells (PBMC)                 | University of Vermont<br>Vaccine Testing Center<br>and Johns Hopkins<br>Center for Immunization<br>Research | Clinicaltrials.gov<br>identifiers:<br>NCT01072786,<br>NCT02021968 |
| <b>Experimental Models: Cell Lines</b>                    |                                                                                                             |                                                                   |
| African green monkey kidney cells (Vero-81)               | Stephen Whitehead,<br>NIAID                                                                                 | RRID:CVC_0059                                                     |

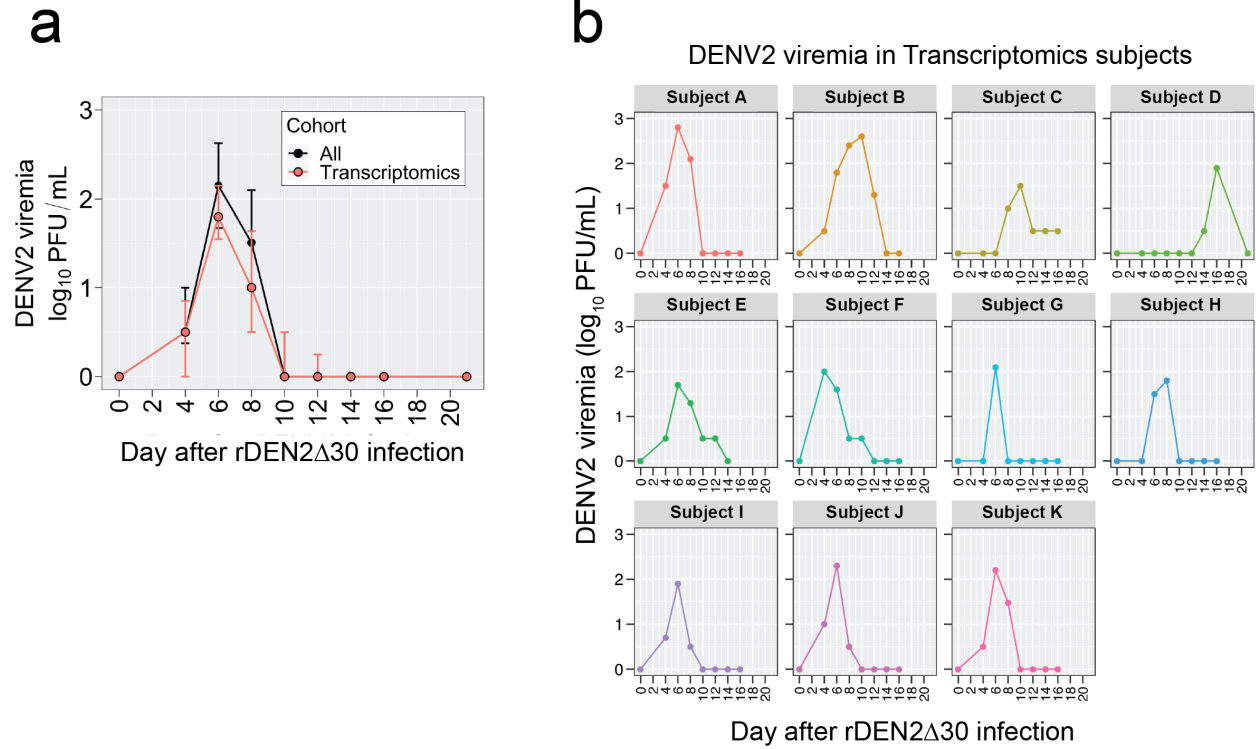

**Supplementary Figure 1 | DENV2 viremia after rDEN2Δ30 infection. (a)** Comparison of DENV2 serum viremia as assessed by plaque assay (expressed as  $\log_{10}$  plaque-forming units/mL of serum) in the parent cohort (All,  $n = 20$ ) from which a subset was selected for transcriptomics analysis ( $n = 11$ ). Median  $\pm$  standard deviation is plotted. **(b)** Individual viremia profiles for each of the subjects in the transcriptomics analysis.

**a**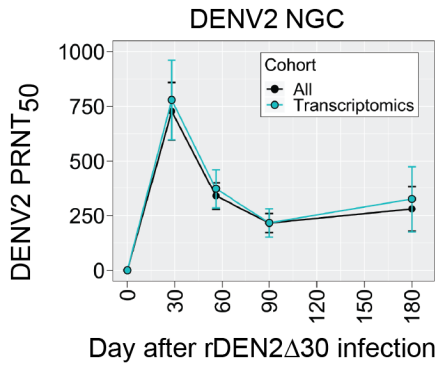**b**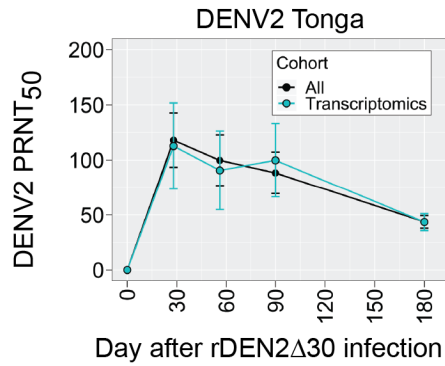**c**

DENV2 serum neutralizing antibodies in transcriptomics subjects

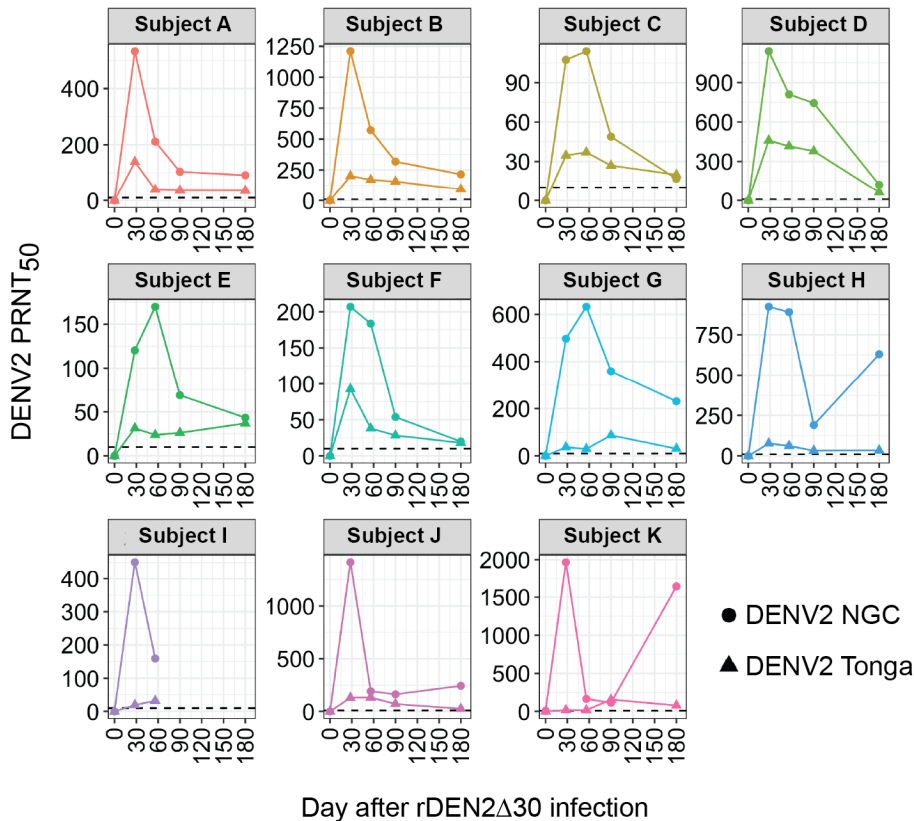

**Supplementary Figure 2 | DENV2 serum neutralizing antibodies after rDEN2Δ30 infection.**

(a) Comparison of DENV2 serum neutralizing antibodies as assessed by plaque reduction neutralization titer 50% (PRNT<sub>50</sub>) to (a) DENV2 NGC (b) DENV2 Tonga in the parent cohort (All,

n = 20) and the subset selected for transcriptomics analysis (n = 11). Mean  $\pm$  standard deviation values are shown. (c) Individual PRNT<sub>50</sub> profiles for DEN2-NGC (circles) and -Tonga (triangles) for each of the subjects in the transcriptomics analysis.

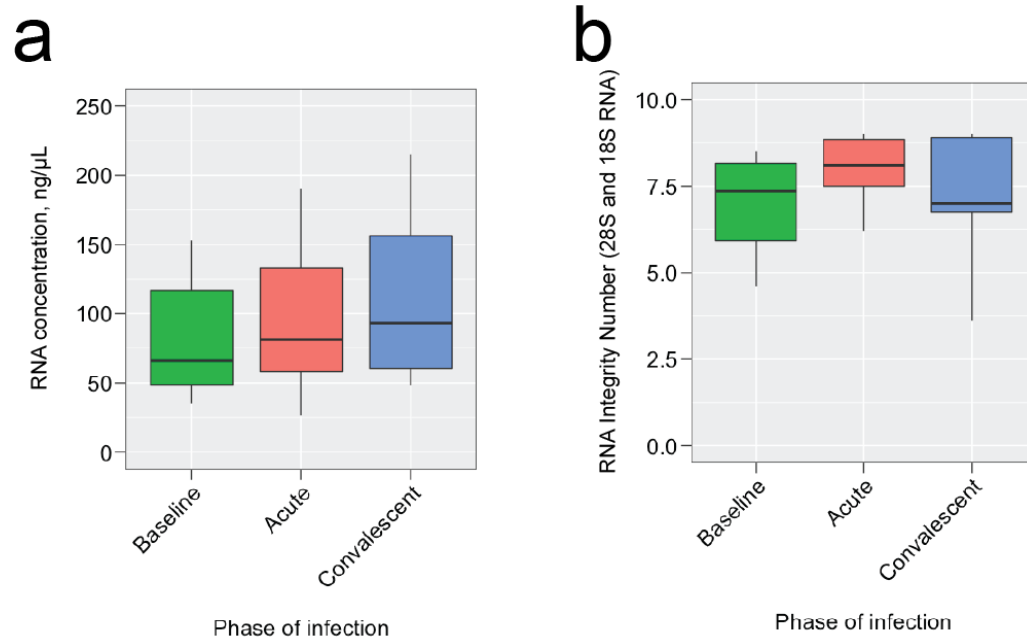

**Supplementary Figure 3 | Quantity and quality of whole blood mRNA during rDEN2 $\Delta$ 30 infection.** (a) RNA quantity (a) and quality (b) in samples isolated at Day 0 (baseline), day 8 (acute) and day 28 (convalescent) after primary rDEN2 $\Delta$ 30 infection (see methods). Boxplots show the median (horizontal line), 95% confidence level (box bounds), and minimum and maximum values (whiskers).

Flow cytometric gating strategy and cell population identifiers for Hanley et al.

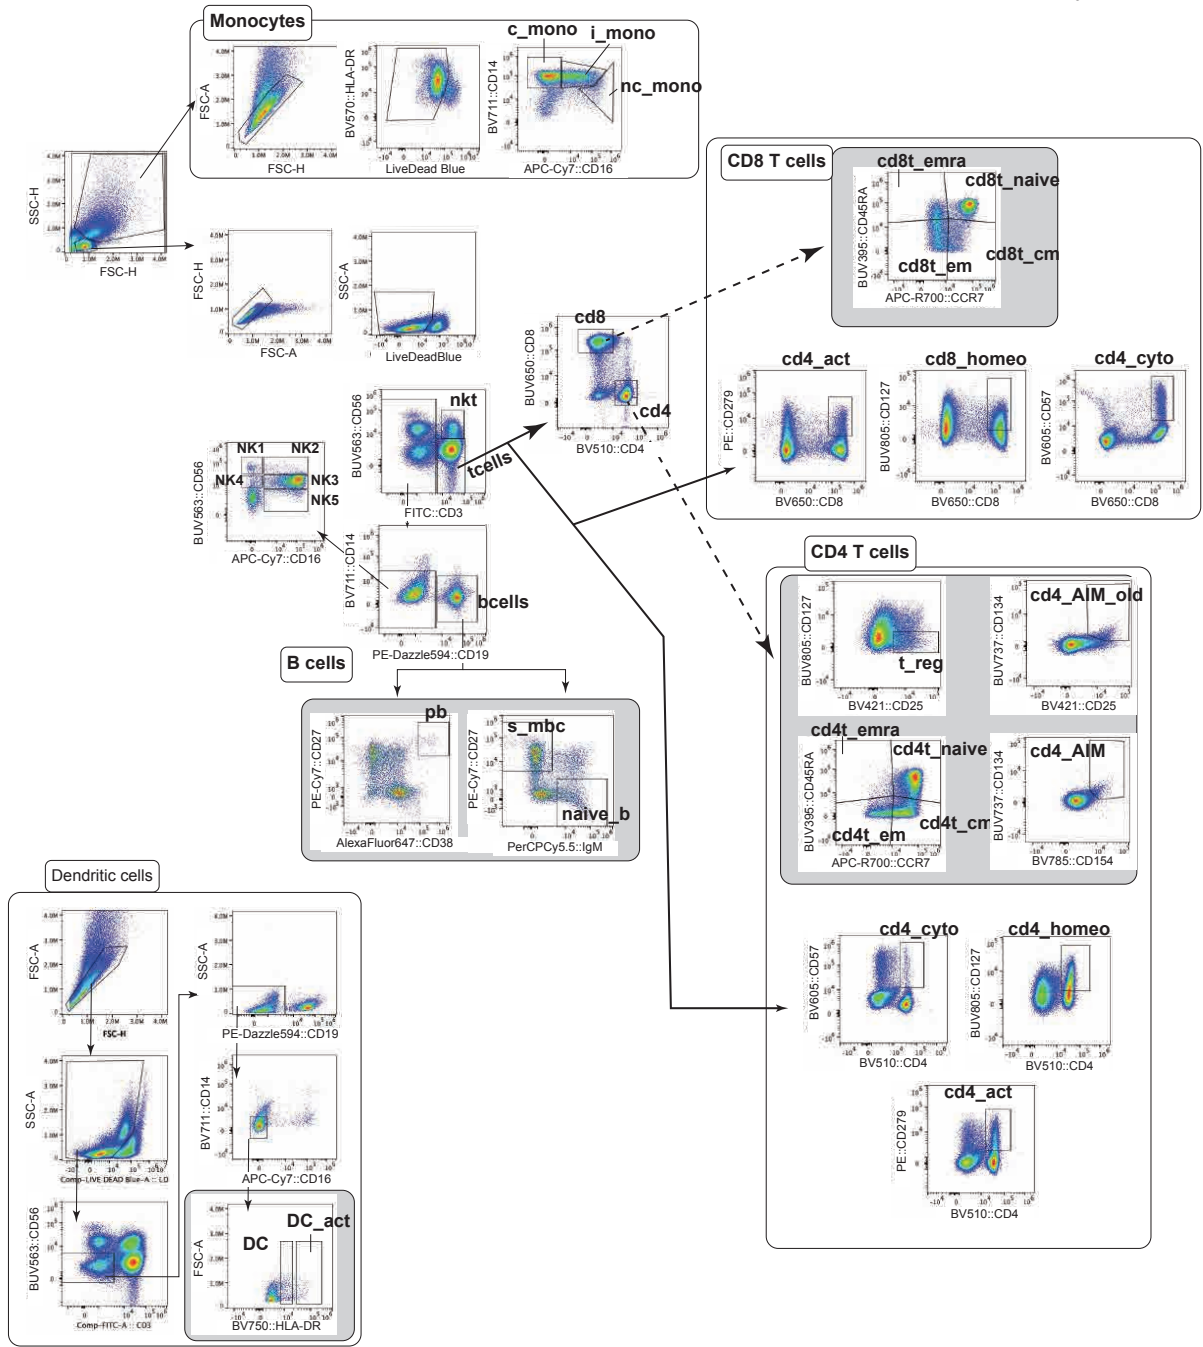

**Supplementary Figure 4 | Flow cytometric gating strategy.** Labels in bold on plots correspond to graph headings in Figure 4. Lineage-negative (CD3<sup>-</sup>CD19<sup>-</sup>CD56<sup>-</sup>CD14<sup>-</sup>CD16<sup>-</sup>) HLA-DR<sup>+</sup> Dendritic cells (**DC**), HLA-DR<sup>hi</sup> activated DC (**DC\_act**); monocytes: classical (**c\_mono**), intermediate (**i\_mono**), and non-classical (**nc\_mono**); natural killer T cells (**nkt**), natural killer cell (**NK**)1-5 populations (defined by CD56 and CD16 staining; CD3<sup>+</sup> T cells (**tcells**), CD4<sup>+</sup> T

cells (**cd4**), and CD8<sup>+</sup> T cells (**cd8**); CD8<sup>+</sup> T cell populations: Activated CD279<sup>+</sup> (**cd8\_act**), cytotoxic CD57<sup>+</sup> (**cd8\_cyto**), CCR7<sup>-</sup>CD45RA<sup>+</sup> T effector re-expressing CD45RA (**cd8t\_emra**), CCR7<sup>+</sup>CD45RA<sup>+</sup> naïve (**cd8t\_naive**), CCR7<sup>-</sup>CD45RA<sup>-</sup> effector memory (**cd8t\_em**), CCR7<sup>+</sup>CD45RA<sup>-</sup> central memory (**cd8t\_cm**), and homeostatic CD127<sup>+</sup> (**cd8\_homeo**); CD4<sup>+</sup> T cell populations: activated CD279<sup>+</sup> (**cd4\_act**), cytotoxic CD57<sup>+</sup> (**cd4\_cyto**), activation-induced marker (AIM)-positive CD154<sup>+</sup>CD134<sup>+</sup> (**cd4\_AIM**), CD25<sup>+</sup>CD134<sup>+</sup> (**cd4\_AIM\_old**), regulatory T cells CD127<sup>-</sup>CD25<sup>+</sup> (**t\_regs**), homeostatic CD127<sup>+</sup> (**cd4\_homeo**), CCR7<sup>-</sup>CD45RA<sup>+</sup> T effector re-expressing CD45RA (**cd4t\_emra**), CCR7<sup>+</sup>CD45RA<sup>+</sup> naïve (**cd4t\_naive**), CCR7<sup>-</sup>CD45RA<sup>-</sup> effector memory (**cd4t\_em**), CCR7<sup>+</sup>CD45RA<sup>-</sup> central memory (**cd4t\_cm**); CD19<sup>+</sup> B cells (**bcells**), plasmablasts CD19<sup>+</sup>CD38<sup>hi</sup>CD27<sup>hi</sup> (**pb**), IgM<sup>+</sup>CD27<sup>-</sup> naïve B cells (**naïve\_b**), and IgM<sup>-</sup>CD27<sup>+</sup> switched memory B cells (**s\_mbc**).



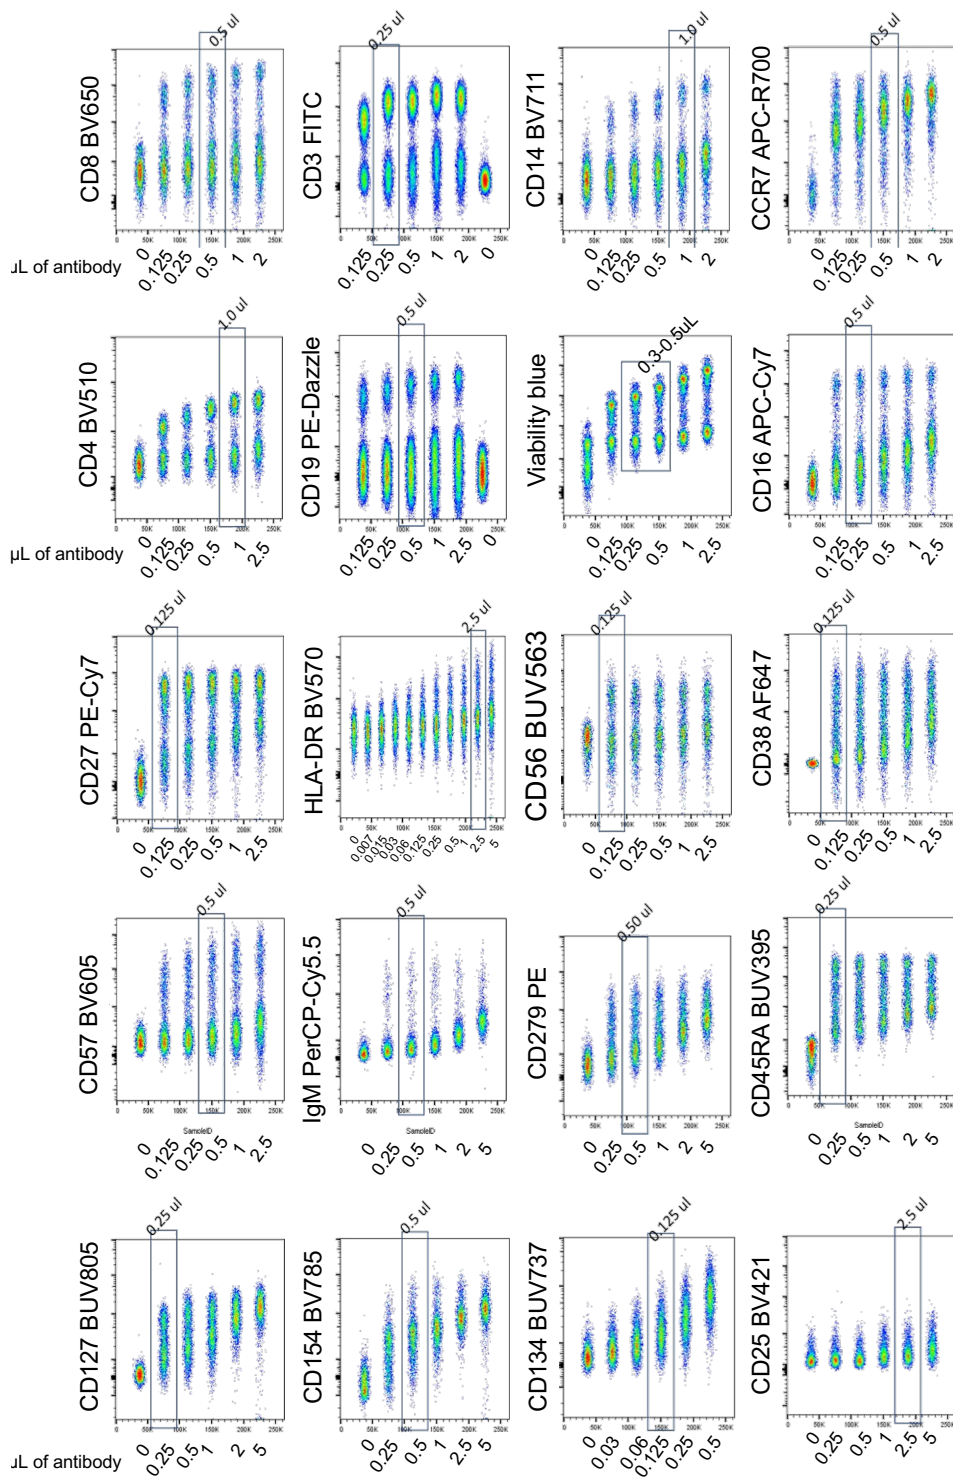

**Supplementary Figure 5 | Titration of flow cytometry staining antibodies for multi-color staining panel.** A range of dilutions of each single antibody was used to stain  $10^6$  PBMCs in 50

$\mu\text{L}$  of staining buffer. The fluorescence profiles of each individual antibody dilution ( $\mu\text{L}$  of antibody used on x-axis) was plotted on a single plot with fluorescent intensity on y-axis). Based on the brightness and separation of signal (positive or negative or range of staining), the final staining amount for each antibody required in the multi-color panel are indicated by the box and label.
